## P531

## Cardiac resynchronization therapy in patients with permanent atrial fibrillation: insights from the HMEA database

Rapacciuolo A.<sup>1</sup>; Solimene F.<sup>2</sup>; Iacopino S.<sup>3</sup>; D'onofrio A.<sup>4</sup>; Pisano E.<sup>5</sup>; Zanutto G.<sup>6</sup>; Curnis A.<sup>7</sup>; Capucci A.<sup>8</sup>; Senatore G.<sup>9</sup>; Pignalberi C.<sup>10</sup>; Maglia G.<sup>11</sup>; Santamaria M.<sup>12</sup>; Giacomelli D.<sup>13</sup>; Gargaro A.<sup>13</sup>; Della Bella P.<sup>14</sup>

<sup>1</sup>Federico II University Hospital, Naples, Italy

<sup>2</sup>Montevergine Cardiology Clinic, Mercogliano, Italy

<sup>3</sup>Maria Cecilia Hospital, Cotignola, Italy

<sup>4</sup>AO dei Colli-Monaldi Hospital, Naples, Italy

<sup>5</sup>Vito Fazzi Hospital, Lecce, Italy

<sup>6</sup>Mater Salutis Hospital, Legnago, Italy

<sup>7</sup>Civil Hospital of Brescia, Brescia, Italy

<sup>8</sup>University Hospital Riuniti of Ancona, Ancona, Italy

<sup>9</sup>Civic Hospital of Cirie, Cirie, Italy

<sup>10</sup>San Filippo Neri Hospital, Rome, Italy

<sup>11</sup>Azienda Ospedaliera Pugliese-Ciaccio, Catanzaro, Italy

<sup>12</sup>Centro di Ricerca e Formazione ad Alta Tecnologia nelle Scienze Biomediche - "Giovanni Paolo II", Campobasso, Italy

<sup>13</sup>BIOTRONIK Italy, Vimodrone, Italy

<sup>14</sup>San Raffaele Hospital, Milan, Italy

**Funding Acknowledgements:** This research did not receive any specific grant from funding agencies in the public, commercial, or not-for-profit sectors.

**Background/Introduction:** The benefits of cardiac resynchronization therapy with defibrillator (CRT-D) in heart failure are well established. However, a gap of evidence is still present for patients with permanent atrial fibrillation (perm-AF)

**Purpose:** To investigate outcomes of CRT-D patients with perm-AF in terms of appropriate shock for ventricular arrhythmia and all-cause mortality in a long-term time horizon.

**Methods:** We used the Home Monitoring Expert Alliance (HMEA) database, a nationwide data repository of daily remote monitoring transmissions. The episodes with delivered shock were adjudicated by a board of 3 electrophysiologists.

**Results:** Among 1226 CRT-D patients (mean age  $71.2 \pm 10.0$  years; 75.5% males), 276 (22.5%) had perm-AF at device implantation. These patients had more frequently rate responsive function (19.7% vs 64.1%) and higher basic rate (median value 60 bpm vs 70 bpm) as compared to all other patients ( $p < 0.001$ ). The CRT pacing percentage calculated over the first 2 months was slightly lower for perm-AF patients (median value 96.0% vs 98.8%,  $p < 0.001$ ).

At 5-year appropriate shock incidence was 34.2% (95% confidence interval [CI], 25.1%-45.3%) for perm-AF and 19.9% (15.6%-25.1%) for all other patients. All-cause mortality was 27.7% (17.7%-41.8%) for perm-AF and 15.6% (12.2%-19.9%) for all other patients.

The age- and sex-adjusted hazard ratio between perm-AF and all other patients was 1.81 (95% CI: 1.25-2.64,  $p = 0.002$ ) for appropriate shock and 0.92 (95% CI: 0.57-1.50,  $p = 0.748$ ) for all-cause mortality.

**Conclusion:** Although a higher incidence of appropriate shock, perm-AF at the time of CRT-D implantation was not associated with increased long-term mortality,

Abstract Figure. Appropriate shock and mortality

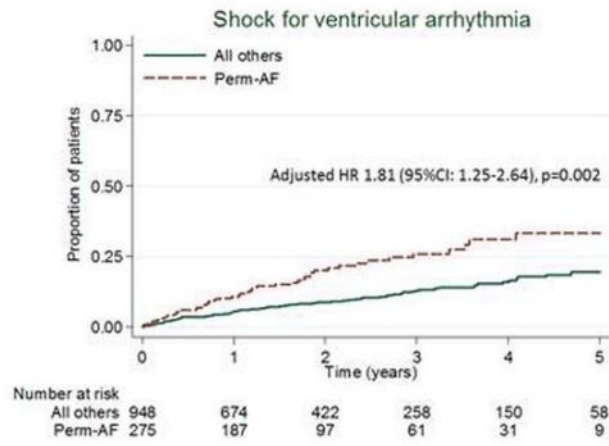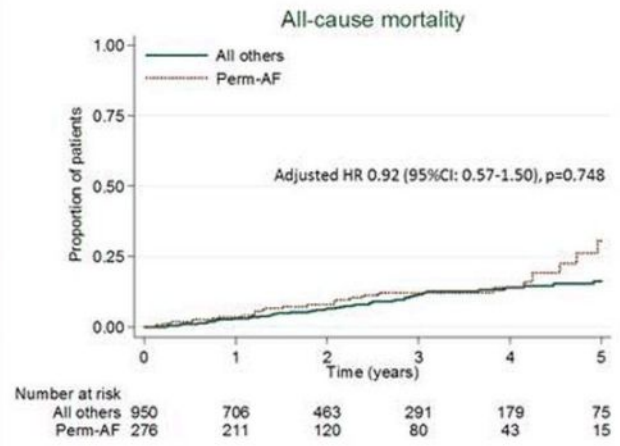

Downloaded from [https://academic.oup.com/europace/article/22/Supplement\\_1/eaab162.183/5858798](https://academic.oup.com/europace/article/22/Supplement_1/eaab162.183/5858798) by guest on 23 April 2024
